# Supplementary material for: Engineered AAV2.7m8 Serotype Shows Significantly Higher Transduction Efficiency of ARPE-19 and HEK293 Cell Lines Compared to AAV5, AAV8 and AAV9 Serotypes
Source: MDPI journal article supplement (doi:10.3390/pharmaceutics16010138), 2024-01-19
Supplement: s1 [file s1]

**AAV8-GFP**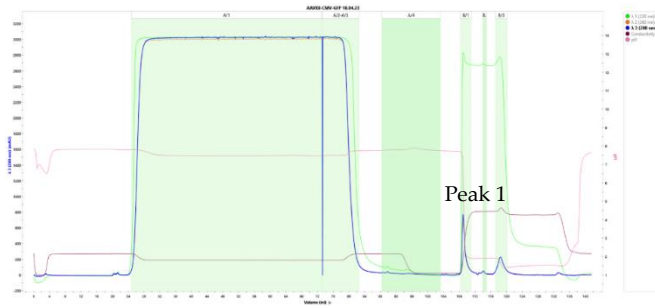**AAV5-GFP**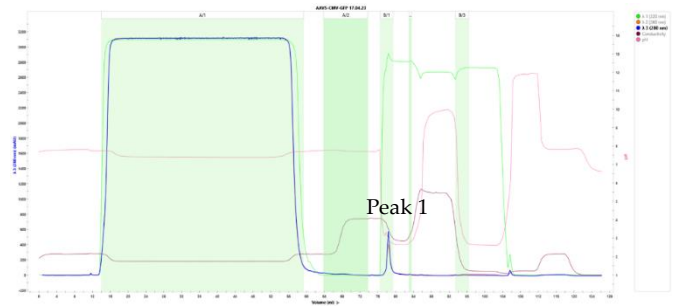**AAV9-GFP**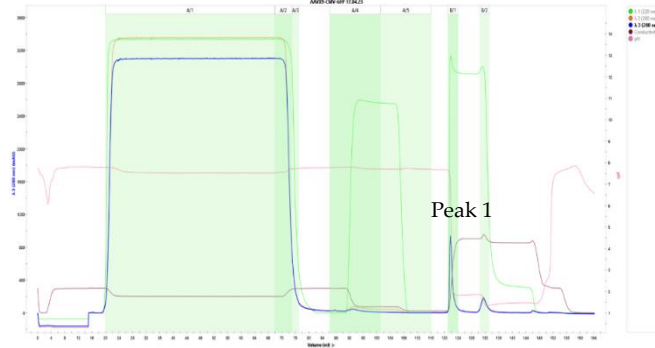**AAV2.7m8-GFP**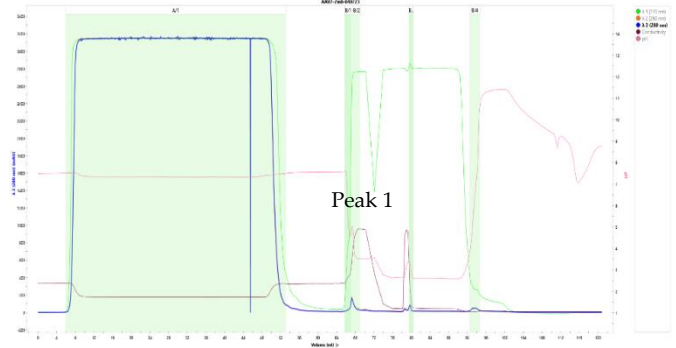

**Figure S2.** Graphical presentation of the affinity chromatography process. Peak 1 – elution of the virus. The fractions were obtained after elution with the respective buffers and the pH of the eluate was adjusted to 7.0.
