# Supplementary material for: Engineered AAV2.7m8 Serotype Shows Significantly Higher Transduction Efficiency of ARPE-19 and HEK293 Cell Lines Compared to AAV5, AAV8 and AAV9 Serotypes
Source: MDPI journal article supplement (doi:10.3390/pharmaceutics16010138), 2024-01-19
Supplement: s1 [file s1]

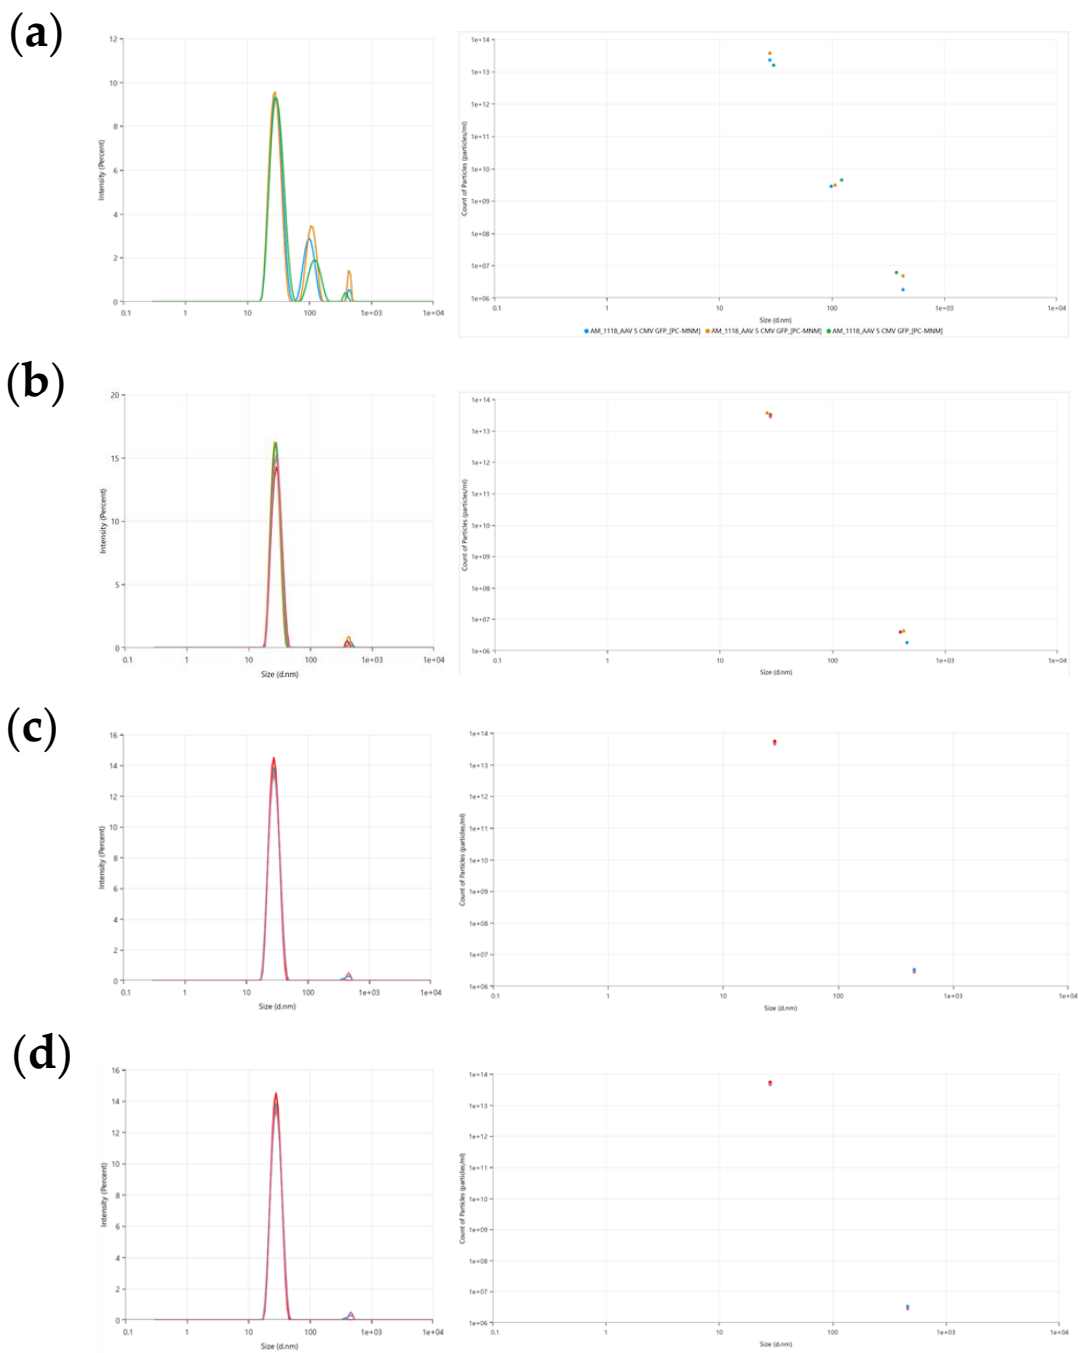

**Figure S3.** Sample analysis by dynamic light scattering (DLS) method. Particle size distribution plots of the AAV samples in relation to particle intensity and concentration. **(a)** – AAV5-GFP, **(b)** – AAV8-GFP, **(c)** – AAV9-GFP, **(d)** – AAV2.7m8-GFP. The obtained results indicate the presence of AAV particles with a hydrodynamic diameter of 29,6 nm, 28.3 nm, 28.8 nm and 26.6 nm in the samples at a concentration of  $2,5 \times 10^{13}$ ,  $3,21 \times 10^{13}$ ,  $5,01 \times 10^{13}$  and  $8,4 \times 10^{11}$  for AAV5-GFP, AAV8-GFP, AAV9-GFP and AAV2.7m8-GFP, respectively. The average volume fraction of particles is 99.99%.
