# Supplementary material for: Engineered AAV2.7m8 Serotype Shows Significantly Higher Transduction Efficiency of ARPE-19 and HEK293 Cell Lines Compared to AAV5, AAV8 and AAV9 Serotypes
Source: MDPI journal article supplement (doi:10.3390/pharmaceutics16010138), 2024-01-19
Supplement: s1 [file s1]

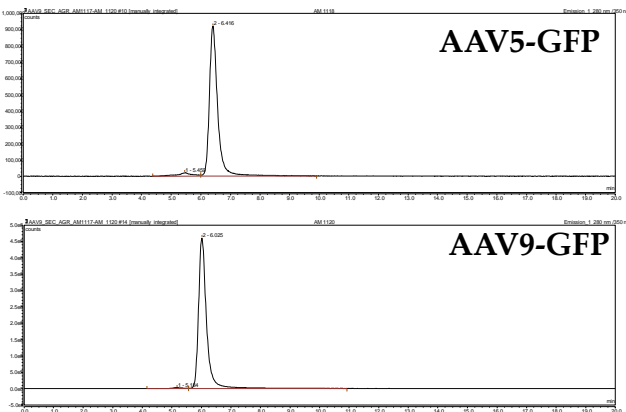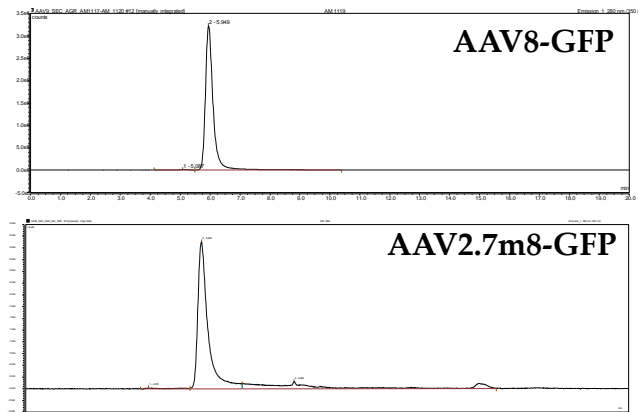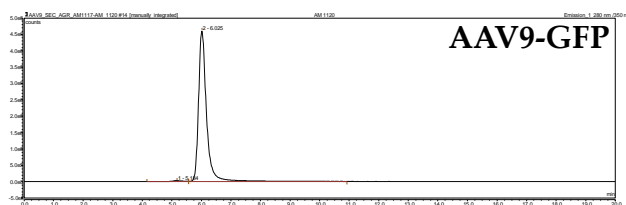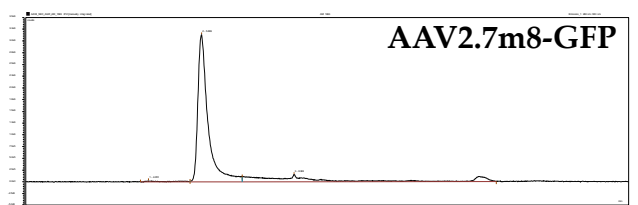

**Figure S4.** Sample analysis by size-exclusion chromatography (SEC) method. The relative monomer percentage for AAV5-GFP, AAV8-GFP, AAV9-GFP and AAV2.7m8-GFP samples was 95,9%, 99,4%, 99,2% and 79,8%; the aggregate fraction was 4,1%, 0,6%, 0,8% and 0,9%, respectively.
