# Supplementary material for: Engineered AAV2.7m8 Serotype Shows Significantly Higher Transduction Efficiency of ARPE-19 and HEK293 Cell Lines Compared to AAV5, AAV8 and AAV9 Serotypes
Source: MDPI journal article supplement (doi:10.3390/pharmaceutics16010138), 2024-01-19
Supplement: s1 [file s1]

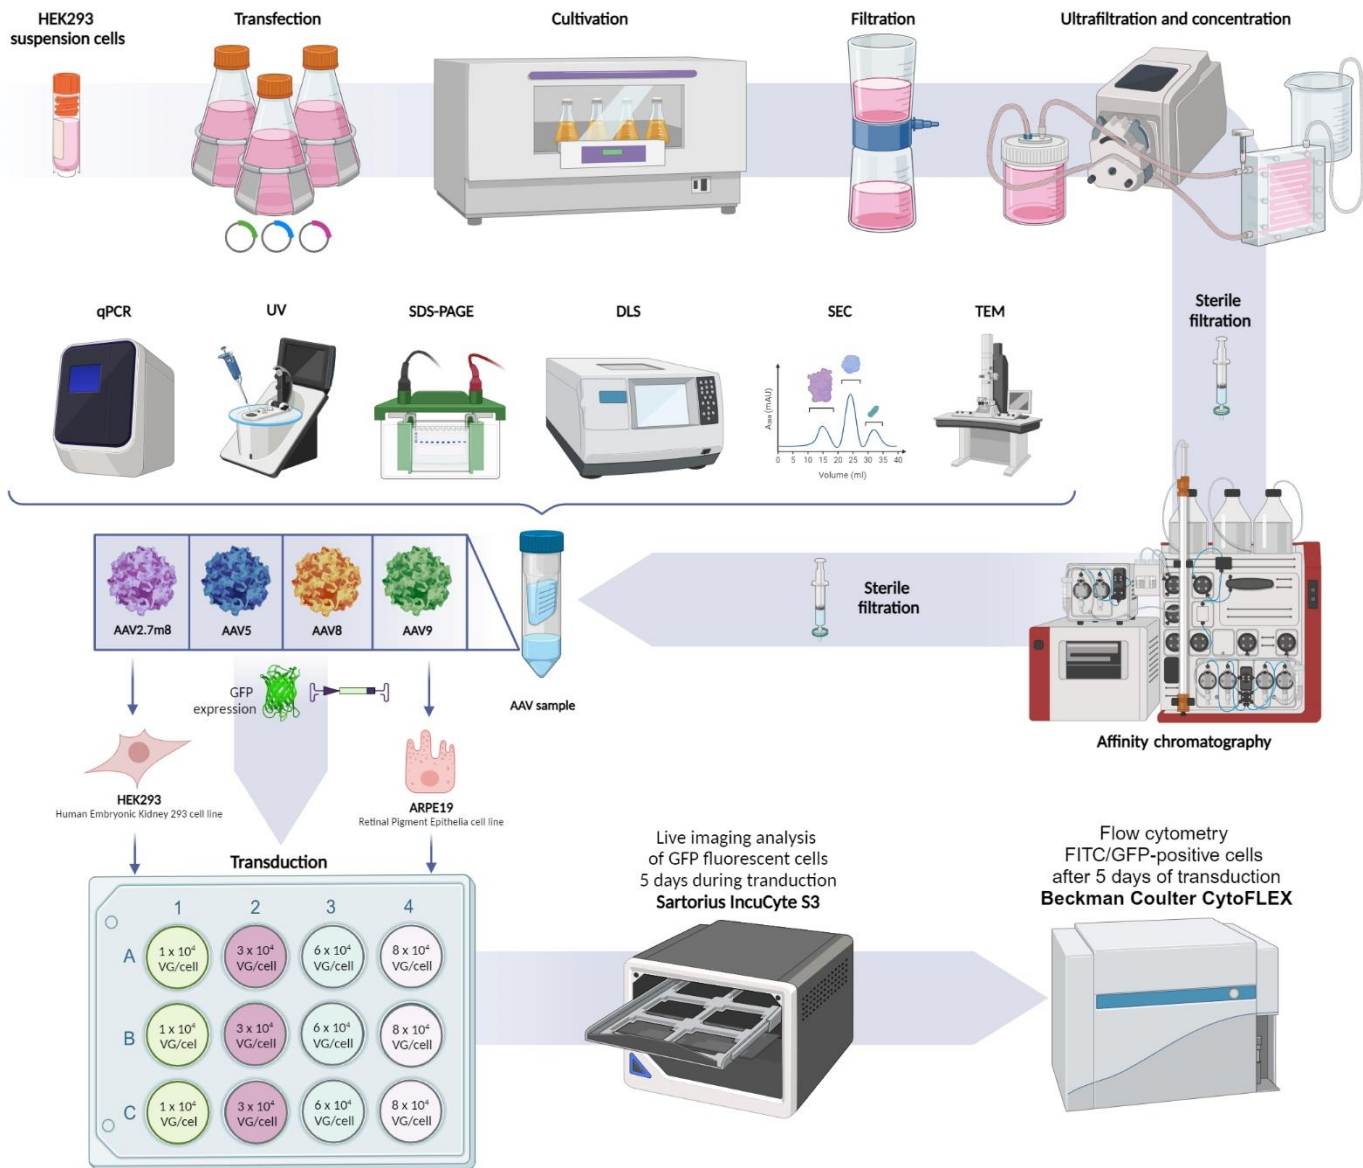

**Figure S1.** Schematic presentation of the virus production, purification, transduction and analysis.
