# Supplementary material for: Engineered AAV2.7m8 Serotype Shows Significantly Higher Transduction Efficiency of ARPE-19 and HEK293 Cell Lines Compared to AAV5, AAV8 and AAV9 Serotypes
Source: Pharmaceutics. 2024 Jan 19;16(1):138. doi: 10.3390/pharmaceutics16010138 (PMC10818700; doi:10.3390/pharmaceutics16010138)
Supplement: Supplementary file 1 [file pharmaceutics-16-00138-s001.zip › Table S1.xlsx]

## Sheet: Лист1
	ARPE-19							HEK293
AAV serotype	MOI	Days						MOI	Days
		0.5	0,5 Average	2	2 Average	4	4 Average		0.5	0,5 Average	2	2 Average	4	4 Average
AAV2.7m8	104	4499.87	4832.48	261551	172046	278665	274965	104	76343.9	74501	473682	455952	460518	442584
		5966.41		247600		246468			81734.5		522370		499096
		4031.14		6987.61		299762			65424.6		371805		368137
	3x104	8366.98	9559.32	414924	269217	425759	397944	3x104	185949	184484	824349	792807	852205	846901
		9400.21		386396		378788			207891		889883		928376
		10910.8		6333.01		389286			159612		664188		760122
	6x104	27429.3	26247.2	547013	370176	562923	547642	6x104	280789	255143	880668	849053	957561	944297
		25742		542962		532859			269311		888599		947863
		25570.5		20551.5		547144			215328		777892		927465
	8x104	43816.1	38551.2	593142	423664	578431	579060	8x104	261273	267942	785929	621075	898641	699068
		34666.4		623194		608035			283907		432079		440019
		37171.1		54656		550713			258645		645218		758544
AAV5	104	1.54753	16.0485	692.09	707.852	1260.72	1178.53	104	308.474	931.9	4588.6	5521.93	29249	26015
		46.5978		733.701		1114.05			2205.4		7020.28		32965
		0		697.764		1160.82			281.822		4956.91		15831.1
	3x104	22.6971	26.0214	1373.35	1645.37	686.759	1491.59	3x104	615.229	573.79	10261.3	9730.98	38362.4	40900.3
		17.0228		1341.19		932.989			534.758		9163.44		50711.7
		38.3443		2221.57		2855.02			571.382		9768.18		33627
	6x104	207.885	135.495	2751.34	2488.43	835.838	1213.55	6x104	696.56	827.241	13963.7	13374.2	44098.2	46845.3
		146.5		2802.23		1811.13			951.215		12462.9		51201.9
		52.1002		1911.71		993.686			833.947		13696		45235.8
	8x104	148.563	105.691	3426.75	3294.46	1725.67	1602.04	8x104	755.538	765.282	15239	15259.2	55193.8	49309.2
		84.2544		3330.11		1897.44			936.427		15195.4		50408.6
		84.2544		3126.53		1183			603.88		15343.1		42325.3
AAV8	104	6.01817	176.361	119.848	237.746	36.9688	90.3872	104	592.532	699.598	7311.73	9300.14	12677.2	13933.8
		514.812		332.891		89.5848			846.327		12544.6		17400.1
		8.25349		260.501		144.608			659.935		8044.06		11724.1
	3x104	76.1728	128.388	810.046	779.898	217.514	403.561	3x104	977.695	1079.09	32430.4	31085.6	50788	44331.5
		229.378		691.058		558.314			1638.83		41341.6		54437.3
		79.6118		838.589		434.856			620.731		19484.8		27769.2
	6x104	100.246	217.17	1997.69	2162.19	2606.04	2521.5	6x104	2253.03	2685.25	44646.1	54208.4	62665	73838.3
		257.062		2032.59		752.443			2993.61		69188		88869.1
		294.203		2456.27		4206.01			2809.11		48791		69980.8
	8x104	303.832	455.375	4081.18	3983.8	1544.43	1469.18	8x104	3816.72	4035.27	65746.6	57875.8	92083.3	82222
		470.105		3526.82		1021.37			3971.13		59415		82907.2
		592.188		4343.4		1841.73			4317.95		48465.7		71675.6
AAV9	104	1.54753	16.0485	692.09	707.852	1260.72	1178.53	104	598.722	694.783	12388.1	11684.1	17489.2	16890.1
		46.5978		733.701		1114.05			805.919		17990		25269.4
		0		697.764		1160.82			679.709		4674.23		7911.83
	3x104	22.6971	26.0214	1373.35	1645.37	686.759	1491.59	3x104	1993.22	2558.01	41680.8	42664.3	55394	56552.4
		17.0228		1341.19		932.989			3330.8		58572.1		76810.9
		38.3443		2221.57		2855.02			2350.01		27740		37452.1
	6x104	207.885	135.495	2751.34	2488.43	835.838	1213.55	6x104	4397.22	5127.71	76849.5	77346	100273	98858.2
		146.5		2802.23		1811.13			6105.86		95608.8		118449
		52.1002		1911.71		993.686			4880.05		59579.7		77852.4
	8x104	148.563	105.691	3426.75	3294.46	1725.67	1602.04	8x104	5468.63	6568.92	78955.5	84911.2	103028	106590
		84.2544		3330.11		1897.44			8022.91		113417		139798
		84.2544		3126.53		1183			6215.22		62361.3		76942.7
