# Supplementary material for: Engineered AAV2.7m8 Serotype Shows Significantly Higher Transduction Efficiency of ARPE-19 and HEK293 Cell Lines Compared to AAV5, AAV8 and AAV9 Serotypes
Source: Pharmaceutics. 2024 Jan 19;16(1):138. doi: 10.3390/pharmaceutics16010138 (PMC10818700; doi:10.3390/pharmaceutics16010138)
Supplement: Supplementary file 1 [file pharmaceutics-16-00138-s001.zip › Table S2.xlsx]

## Sheet: Лист1
	ARPE-19				HEK293
AAV serotype	MOI	Days			MOI	Days
		0.5	2	4		0.5	2	4
AAV2.7m8/AAV5	104	1.2813	6.4736	6.2455	104	79.9453	82.5712	15.78
	3x104	7.4829	6.3711	7.8424	3x104	444.663	87.2525	23.9656
	6x104	20.5983	8.9055	11.0704	6x104	323.898	46.4383	15.3219
	8x104	16.4203	4.7095	7.0551	8x104	241.067	51.9561	15.7353
AAV2.7m8/AAV8	104	25.5151	1100.13	3083.01	104	106.491	49.0264	31.7633
	3x104	144.749	495.444	938.613	3x104	236.443	27.3134	21.3008
	6x104	201.759	274.325	241.14	6x104	99.7828	11.4571	9.4676
	8x104	84.6581	106.347	394.138	8x104	45.7179	13.6984	10.3002
AAV2.7m8/AAV9	104	280.393	369.5	236.451	104	107.229	39.0232	26.2037
	3x104	714.178	234.838	253.949	3x104	99.7427	19.9008	16.6977
	6x104	323.378	238.36	501.038	6x104	52.2537	8.0298	7.0714
	8x104	364.756	128.599	361.452	8x104	28.0844	9.3369	7.9454
