# Supplementary material for: Engineered AAV2.7m8 Serotype Shows Significantly Higher Transduction Efficiency of ARPE-19 and HEK293 Cell Lines Compared to AAV5, AAV8 and AAV9 Serotypes
Source: Pharmaceutics. 2024 Jan 19;16(1):138. doi: 10.3390/pharmaceutics16010138 (PMC10818700; doi:10.3390/pharmaceutics16010138)
Supplement: Supplementary file 1 [file pharmaceutics-16-00138-s001.zip › Table S3.xlsx]

## Sheet: Лист1
	ARPE-19					HEK293
AAV serotype	MOI	GFP+			GFP+ Average	MOI	GFP+			GFP+ Average
AAV2.7m8	104	76.4	79.4		77.9	104	73.4	73.3	67.3	71.33
	3x104	90.8	92.4		91.6	3x104	91.5	93.3	91.2	92
	6x104	96.9	96.9		96.9	6x104	94.4	96.3	95.1	95.27
	8x104	97.1	98.1		97.6	8x104	96	96.3	96.1	96.13
AAV5	104	32.2	30.3		31.25	104	4.05	4.26	3.71	4.01
	3x104	44.9	44.2		44.55	3x104	7.1	7.57	6.94	7.2
	6x104	51.3	52.3		51.8	6x104	12.5	12.2	10.7	11.8
	8x104	54.6	53.5		54.05	8x104	12.5	15.7	13.2	13.8
AAV8	104	1.5	1.45	1.45	1.47	104	4.32	3.5	3.16	3.66
	3x104	3.35	3.36	3.5	3.4	3x104	11.7	9.7	8.69	10.03
	6x104	8.53	8.67	9.46	8.89	6x104	15.7	19.5	16.9	17.37
	8x104	14.9	13.9	16.1	14.97	8x104	22.5	25.9	26.4	24.93
AAV9	104	1.39	1.4	1.44	1.41	104	7.92	7.32	4.15	6.46
	3x104	4.33	4.58	4.38	4.43	3x104	15.2	16.6	11.6	14.47
	6x104	8.41	8.43	8.93	8.59	6x104	25.5	28.6	23.3	25.8
	8x104	11.8	10.5	11	11.1	8x104	31.7	34	25	30.23
