# Supplementary material for: Engineered AAV2.7m8 Serotype Shows Significantly Higher Transduction Efficiency of ARPE-19 and HEK293 Cell Lines Compared to AAV5, AAV8 and AAV9 Serotypes
Source: Pharmaceutics. 2024 Jan 19;16(1):138. doi: 10.3390/pharmaceutics16010138 (PMC10818700; doi:10.3390/pharmaceutics16010138)
Supplement: Supplementary file 1 [file pharmaceutics-16-00138-s001.zip › Table S4.xlsx]

## Sheet: Лист1
	ARPE-19					HEK293
AAV serotype	MOI	MFI			MFI Average	MOI	MFI			MFI Average
AAV2.7m8	104	32089	27204		29646.5	104	20072	25954	26129	24051.7
	3x104	98620	84141		91380.5	3x104	63236	79079	68671	70328.7
	6x104	207826	200029		203928	6x104	93317	132345	92356	106006
	8x104	292286	229082		260684	8x104	118050	161274	119283	132869
AAV5	104	2725	2995		2860	104	1233	1274	1073	1193.33
	3x104	5337	5467		5402	3x104	1491	1491	1376	1452.67
	6x104	7534	7215		7374.5	6x104	1868	1996	1985	1949.67
	8x104	7944	8273		8108.5	8x104	2061	2308	1970	2113
AAV8	104	731	705	764	733.333	104	1217	1152	1253	1207.33
	3x104	838	790	892	840	3x104	1597	1593	1790	1660
	6x104	1006	942	939	962.333	6x104	2510	2688	2258	2485.33
	8x104	1355	1263	1197	1271.67	8x104	4227	3787	3285	3766.33
AAV9	104	894	907	884	895	104	1344	1589	1515	1482.67
	3x104	918	843	884	881.667	3x104	2240	2430	2333	2334.33
	6x104	1082	1006	1076	1054.67	6x104	3680	4494	3875	4016.33
	8x104	1082	1006	1076	1054.67	8x104	4035	5369	5073	4825.67
