# Supplementary figures and images for: Engineered AAV2.7m8 Serotype Shows Significantly Higher Transduction Efficiency of ARPE-19 and HEK293 Cell Lines Compared to AAV5, AAV8 and AAV9 Serotypes
Source: MDPI journal article supplement (doi:10.3390/pharmaceutics16010138), 2024-01-19

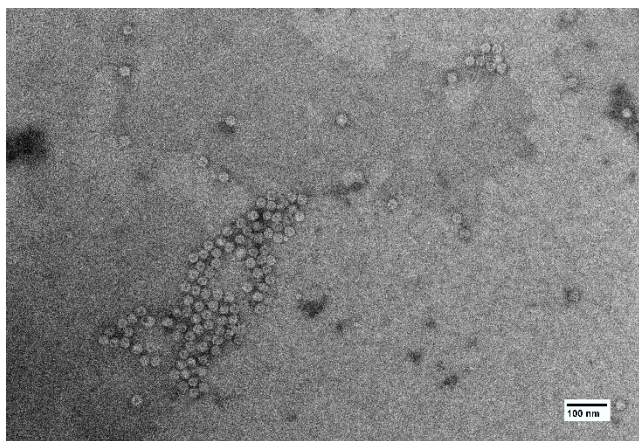

**AAV2.7m8**

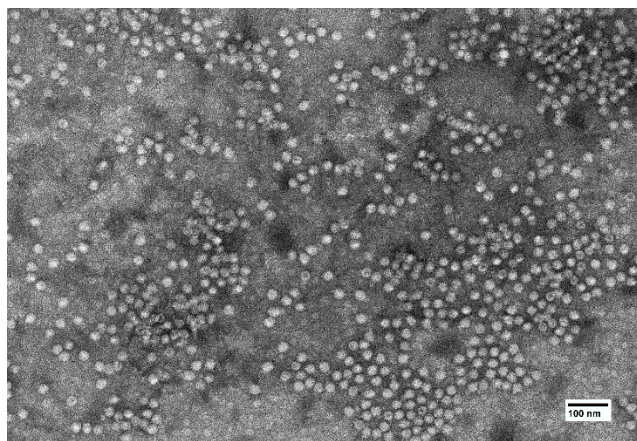

**AAV5**

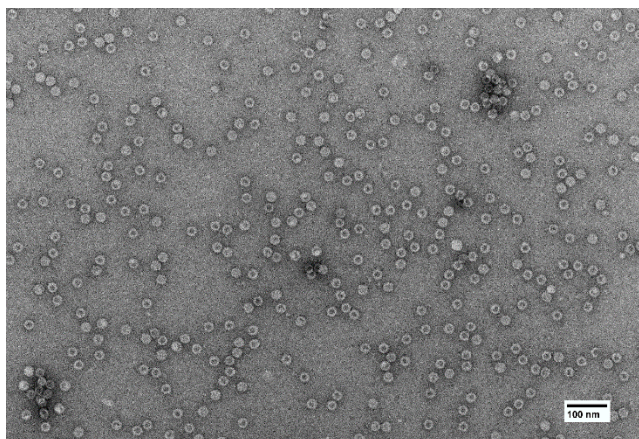

**AAV8**

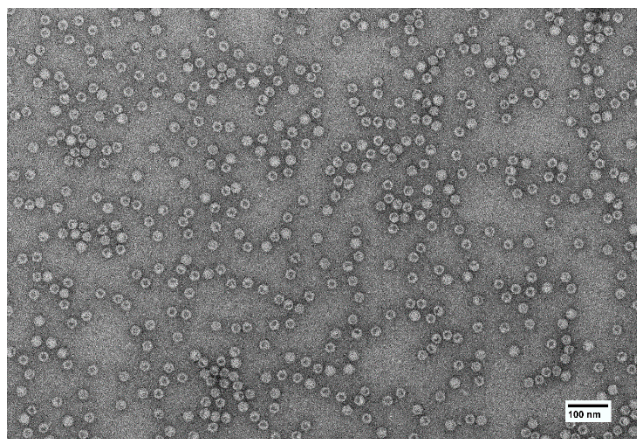

**AAV9**

**Figure S5.** Transmission electron microscopy (TEM) of the virus preparations.

Supplement: s1 [file s1]
